# Supplementary material for: Complete human serum maintains viability and chondrogenic potential of human synovial stem cells: suitable conditions for transplantation
Source: PubMed Central journal article supplement (PMC5470274; doi:10.1186/s13287-017-0596-0), 2017-06-13

Supplementary figure 3

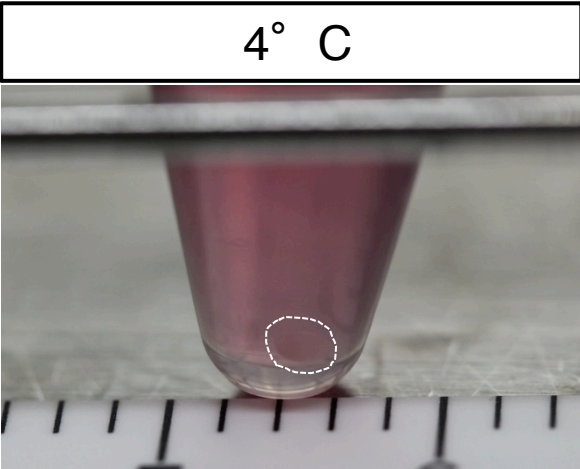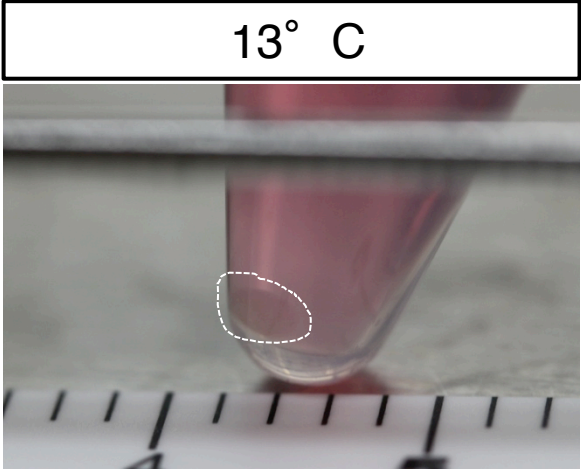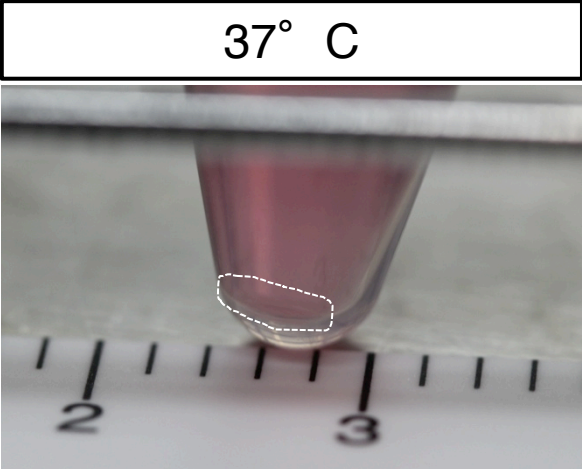

Supplement: 13287_2017_596_MOESM4_ESM.pdf [file 13287_2017_596_MOESM4_ESM.pdf]
